# 1 Exploring COVID-19 vaccine uptake among healthcare workers in Zimbabwe: A 2 mixed methods study

3 Tinotenda Taruvinga<sup>1,2,3</sup>; Rudo S. Chingono<sup>1</sup>; Edson Marambire<sup>1,4</sup>; Leyla Larsson<sup>1,4</sup>; Ioana D. Olaru<sup>1,5</sup>;  
4 Sibusisiwe Sibanda<sup>1</sup>; Farirayi Nzvere<sup>1</sup>; Nicole Redzo<sup>1</sup>; Chiratidzo E. Ndhlovu<sup>6</sup>; Simbarashe Rusakaniko<sup>7</sup>;  
5 Hilda Mujuru<sup>8</sup>; Edwin Sibanda<sup>9</sup>; Prosper Chonzi<sup>10</sup>; Maphios Siamuchembu<sup>11</sup>; Rudo Chikodzore<sup>12</sup>; Agnes  
6 Mahomva<sup>13</sup>; Rashida A. Ferrand<sup>1,5</sup>; Justin Dixon<sup>1,2</sup>; Katharina Kranzer<sup>1,4,5</sup>.

7

- 8 1. The Health Research Unit Zimbabwe, Biomedical Research & Training Institute, Harare, Zimbabwe
- 9 2. Department of Global Health and Development, London School of Hygiene and Tropical Medicine,  
10 London, UK
- 11 3. Africa Centres for Diseases Prevention and Control (Africa CDC), Addis Ababa, Ethiopia,
- 12 4. Division of Infectious Diseases and Tropical Medicine, LMU University Hospital, LMU Munich, Germany
- 13 5. Clinical Research Department, London School of Hygiene and Tropical Medicine, London, UK
- 14 6. Internal Medicine Unit, University of Zimbabwe Faculty of Medicine and Health Sciences Harare,  
15 Zimbabwe
- 16 7. Department of Community Medicine, College of Health Sciences, University of Zimbabwe, Harare,  
17 Zimbabwe
- 18 8. Department of Paediatrics and Child Health, University of Zimbabwe College of Health Sciences,  
19 Harare, Zimbabwe
- 20 9. Bulawayo City Council Health Department, Bulawayo, Zimbabwe
- 21 10. Harare City Council Health Department, Harare, Zimbabwe
- 22 11. Ministry of Health and Child Care, Provincial Medical Directorate, Bulawayo, Zimbabwe
- 23 12. Ministry of Health and Child Care, Department of Epidemiology and Diseases Control, Harare,  
24 Zimbabwe
- 25 13. National Response to the COVID-19 Pandemic, Office of the President, and Cabinet, Harare, Zimbabwe

**NOTE: This preprint reports new research that has not been certified by peer review and should not be used to guide clinical practice.**

26 **&Equally contributing senior authors**

27

28 **Corresponding author**

29 Tinotenda Taruvinga

30 The Health Research Unit Zimbabwe (THRU ZIM)

31 Biomedical Research and Training Institute

32 10, Seagrave Road

33 Harare, Zimbabwe

34 E-Mail: [Tinotenda.Taruvinga1@ishtm.ac.uk](mailto:Tinotenda.Taruvinga1@ishtm.ac.uk)

35

36 **Authors' contributions**

37 TT, JD, and KK conceptualized the study. LL, NR, TT, and EM cleaned and curated the data. TT, LL, IO,

38 RSC with the support from KK and JD analyzed the data. KK and RAF acquired the funds for the study.

39 SS supported by RSC, EM, FN, and TT performed the qualitative data collection. Study coordination and

40 supervision of field teams was done by EM and FN. TT wrote the first draft of the manuscript with

41 feedback by JD and KK. All authors provided feedback on the manuscript and read and approved the

42 final version of the manuscript.

43

44

45

46

47

48 **ABSTRACT**

49 With COVID-19 no longer categorized as a public health emergency of international concern, vaccination  
50 strategies and priority groups for vaccination have evolved. Africa Centers for Diseases Prevention and  
51 Control proposed the ‘100-100-70%’ strategy which aims to vaccinate all healthcare workers, all  
52 vulnerable groups, and 70% of the general population. Understanding whether healthcare workers were  
53 reached during previous vaccination campaigns and what can be done to address concerns, anxieties,  
54 and other influences on vaccine uptake, will be important to optimally plan how to achieve these ambitious  
55 targets. In this mixed-methods study, between June 2021 and July 2022 a quantitative survey was  
56 conducted with healthcare workers accessing a comprehensive health check in Zimbabwe to determine  
57 whether and, if so, when they had received a COVID-19 vaccine. Healthcare workers were categorized  
58 as those who had received the vaccine ‘early’ (before 30.06.2021) and those who had received it ‘late’  
59 (after 30.06.2021). In addition, 17 in-depth interviews were conducted to understand perceptions and  
60 beliefs about COVID-19 vaccines. Of the 2905 healthcare workers employed at 37 facilities who  
61 participated in the study, 2818 (97%, 95% CI [92%-102%]) reported that they had received at least one  
62 vaccine dose. Geographical location, older age, higher educational attainment and having a chronic  
63 condition was associated with receiving the vaccine early. Qualitatively, (mis)information, infection risk  
64 perception, quasi-mandatory vaccination requirements, and legitimate concerns such as safety and  
65 efficacy influenced vaccine uptake. Meeting the proposed 100-100-70 target entails continued emphasis  
66 on strong communication while engaging meaningfully with healthcare workers’ concerns. Mandatory  
67 vaccination may undermine trust and should not be a substitute for sustained engagement.

68

69

70

71

## 72 INTRODUCTION

73 Coronavirus disease 2019 (COVID-19) vaccines have been a key pillar of the pandemic response at  
74 global, national, and local levels. Their roll-out has reduced morbidity, severity and deaths [1–3].  
75 However, vaccine nationalism and global unequal vaccine distribution limited the availability of COVID-  
76 19 vaccines, especially in low- and middle-income countries (LMICs) [4,5], resulting in slow and often  
77 erratic roll out [5]. In response to vaccine nationalism and accessibility challenges, various international  
78 platforms were created to increase vaccine availability in LMICs, including the COVID-19 vaccine delivery  
79 partnership (CoVDP) (which is an alliance of the WHO, UNICEF and GAVI) and the COVID-19 vaccines  
80 global access (COVAX) platform [4,6]. While many LMICs signed up to the COVAX initiative, others opted  
81 for bilateral arrangements [7]. For instance Zimbabwe, the focus of our research, did not initially sign up  
82 to the COVAX initiative and instead obtained vaccines through bilateral agreements with China, Russia  
83 and India [4,7].

84

85 To optimize the use of limited and often unpredictable supply of vaccines, Zimbabwe like many LMICs  
86 used a phased approach that prioritized at-risk groups for vaccination, including healthcare workers [8,9].  
87 Prioritizing and ensuring high vaccine uptake among healthcare workers was important for several  
88 reasons. First, healthcare workers were widely recognized as being at heightened risk of COVID-19, as  
89 reflected in the high mortality rate during the pandemic [10,11]. Second, vaccination among healthcare  
90 workers has further ramifications in terms of preventing nosocomial transmission and more broadly for  
91 ensuring the human resourcing of health systems [12,13]. Third, vaccine uptake among healthcare  
92 workers has a considerable influence on uptake among the general population [9,13]. Studies from both  
93 high-income and LMICs suggest a considerable proportion of the general population would consider  
94 healthcare workers' advice before vaccination [14–16].

95

96 Vaccine strategies have evolved over the last two years and new recommendations on who should be  
97 prioritized for COVID-19 vaccination have been released. On the 5<sup>th</sup> of May 2023, the WHO has de-  
98 escalated the COVID-19 pandemic as a public health emergency of international concern [17]. Related  
99 to the new recommendations, Africa CDC in their new strategy have maintained healthcare workers as a  
100 priority group with a target set to reach 100% COVID-19 vaccine coverage among this group [18]. In view  
101 of this ambitious target of vaccinating all healthcare workers, it is crucial to understand whether past  
102 vaccination strategies were successful and what could be done to address healthcare workers'  
103 perceptions, anxieties, and concerns to reach the ambitious 100% target. Strategies to achieve universal  
104 vaccine coverage will likely need to be context-sensitive and informed by actual uptake data during the  
105 pandemic. In this mixed-methods study, we sought to understand vaccine uptake, perceptions, and  
106 attitudes among healthcare workers in Zimbabwe.

107

## 108 **METHODS**

### 109 **Study design**

110 Data was collected as part of a study providing a comprehensive health check to healthcare workers in  
111 Zimbabwe which has been described in detail elsewhere [19]. A quantitative survey and in-depth  
112 interviews were conducted with selected healthcare workers accessing the service between June 2021  
113 and July 2022.

114

### 115 **Study setting and population**

116 Zimbabwe is a low-income country with a long history of severe economic decline affecting healthcare  
117 services, public health programmes, and epidemic management capacity [20,21]. During the study  
118 period, healthcare workers had taken up industrial action over low wages and unavailability of adequate  
119 personal protective and medical equipment [20,22]. The study was conducted in public hospitals across  
120 all ten provinces in Zimbabwe and primary care clinics in Harare, Matabeleland North, and Mashonaland

121 East. The study participants were clinical and non-clinical healthcare workers who accessed the  
122 comprehensive health check service.

123

#### 124 **Zimbabwe's COVID-19 vaccination campaign**

125 Zimbabwe launched its COVID-19 vaccination campaign on 22 February 2021 and started distributing  
126 booster doses in December 2021 [23,24]. The country approved the use of Sinopharm and Sinovac  
127 before they had received Emergency Authorization Use (EAU) by the WHO [25], followed by Covax,  
128 Sputnik V and Johnson and Johnson [26]. However, only Sinopharm and Sinovac were readily available  
129 in the public sector [27].

130

131 Vaccines were supplied in batches and were initially distributed primarily in Harare and Bulawayo (the  
132 two largest cities in Zimbabwe) which had reported the highest number of SARS-CoV-2 infections. Other  
133 provinces received vaccines as the supply chain improved. By 31 July 2022, an estimated 11,8 million  
134 doses had been administered, resulting in a target population coverage of 53.2% for the first dose, 41.3%  
135 for the second dose, and 7.4% for the third dose [28]. Fig 1 shows administered vaccine doses and  
136 SARS-CoV-2 infections over time. The highest number of vaccine doses were administered during the  
137 third wave primarily driven by the delta variant which resulted in the highest number of deaths.

138

139

140 **Fig 1. Routine data on vaccine doses administered and notified SARS-CoV-2 infections obtained**  
141 **from the daily published Ministry of Health and Child Care situational reports.**

142

#### 143 **Procedures**

144 Following verbal informed consent and prior to accessing the health check, healthcare worker data on  
145 age, sex, professional role, education, clinical history, past SARS-CoV-2 infection and COVID-19

146 vaccination history, and perceived vaccine safety were obtained. Questions about perceived vaccine  
147 safety were based on a WHO survey tool [18]. Written informed consent from selected healthcare workers  
148 was obtained for in-depth interviews to better understand healthcare workers reasons for taking or not  
149 taking up the COVID-19 vaccine and the challenges they may have faced in the process.

150

151 For the in-depth interviews, healthcare workers were purposively selected (after accessing the health  
152 check) based on their vaccination status, the time of their first vaccination dose and the place they  
153 worked. A total of 17 in-depth interviews were conducted, after reaching a data saturation point [29]. A  
154 topic guide was developed prior to the interview and included questions about participants' vaccination  
155 status, challenges of accessing vaccines, concerns about vaccine safety, reasons for being vaccinated  
156 or not, and sources of information to guide decision-making. During interviews, participants were given a  
157 broader remit to discuss more general concerns and anxieties, as well as why there were these concerns  
158 in context, including what specifically concerned them as healthcare workers. While the questions asked  
159 as part of the quantitative questionnaire specifically asked about personal reasons for not getting  
160 vaccinated (if they had not been vaccinated), the in-depth interview guide gave healthcare workers room  
161 to express both positive and negative anxieties they had and those their patients, families and  
162 communities may have voiced. The interviews were conducted in English, Ndebele, or Shona according  
163 to the participant's choice and lasted between 30 to 75 minutes. Interviewing stopped after exhausting  
164 all possible probing questions.

165

### 166 **Data management and analysis**

167 Quantitative data were collected using electronic real time data entry (SurveyCTO). Electronic  
168 questionnaires were uploaded daily and saved to a Microsoft SQL server. Participants were identified by  
169 a unique identification number. The data was analysed in R version 4.1.2. Means and medians for  
170 continuous variables and proportions for categorical variables were calculated. The main outcome

171 variable was receiving the vaccine 'early' or 'later'. Healthcare workers categorised as receiving the  
172 vaccine "early" were defined as having received the first vaccine dose between 22<sup>nd</sup> of February and 30<sup>th</sup>  
173 of June 2021, while somebody receiving the first vaccine dose after June 2021 was categorised as "late".

174

175 Staff roles were categorised into clinical and non-clinical, where clinical staff included, nurses, doctors,  
176 laboratory technicians, nurse aides, radiographers, rehabilitation technicians, and pharmacists. Non-  
177 clinical staff included administrators, environmental health practitioners, security guards, cleaners, and  
178 health information staff. Health facilities were categorised based on their level of care: primary  
179 (polyclinics), secondary (district and mission hospitals), tertiary (provincial hospitals) and quaternary  
180 (central specialised group of hospitals). These facilities were either owned by local authority, the central  
181 government, or faith-based organisations. Past medical history of co-morbidities was coded as i) none ii)  
182 one or iii) two or more co-morbidities. Co-morbidities which were ascertained through self-report included:  
183 HIV, asthma, chronic lung disease, cancer, diabetes, hypertension, cardiovascular disease, and chronic  
184 kidney disease. Body mass index (BMI) was calculated using weight and height. Healthcare workers with  
185 a BMI <18.5, 18.5-24.9, 25-29.9, and >30 were categorised as underweight, healthy, overweight, and  
186 obese respectively.

187

188 In-depth interviews were audio-recorded, transcribed, and translated. During the interview, research  
189 assistants took field notes and wrote interview summaries at the end of the day. Transcripts and other  
190 qualitative data (i.e., field notes and interview summaries) were imported into the qualitative data analysis  
191 software NVivo 12, which was used to perform thematic analysis. Thematic analysis was performed on  
192 an ongoing basis synchronously and after data collection. Using the principles of grounded theory,[29]  
193 we fed working hypotheses generated from interim analysis into the ongoing collection of data. This  
194 created progressively broader and more encompassing themes to explain and theorise findings.



195 Quantitative findings were triangulated with the themes emerging from the qualitative data throughout the  
196 analysis process to create meaning of the findings.

197

## 198 **Ethical approval**

199 Ethical approval was obtained from the Medical Research Council Zimbabwe (MRCZ/A/2627); the  
200 Biomedical Research and Training Institute and the London School of Hygiene and Tropical Medicine  
201 ethics committees (22514). For healthcare workers accessing the health check service and responding  
202 to the quantitative questionnaire verbal informed consent was obtained. The Medical Research Council  
203 Zimbabwe waived the necessity for a written informed consent to facilitate access to the service. Written  
204 informed consent was obtained from all participants for participation in the in-depth interviews.

205

## 206 **RESULTS**

### 207 **REPORTED VACCINE UPTAKE AMONG HEALTH CARE WORKERS**

208 A total of 2905 healthcare workers from 37 health facilities accessed the service during the study period,  
209 half of which worked at facilities in Harare and Bulawayo provinces (Table 1). Three-quarters (2201/2905,  
210 76%) were women, and median age was 37 (IQR: 20-53) years. The majority of healthcare workers had  
211 clinical roles (1726/2905, 59%). A total of 866 (29.8%) healthcare workers had one or more known chronic  
212 diseases, and 63.6% (1847/2905) were either overweight or obese and more than half (1496/2905,  
213 51.4%) worked at a government-owned institution. Past SARS-CoV-2 infections were reported by 1063  
214 (36.6%) healthcare workers.

215

216 Almost all healthcare workers (2818/2905, 97%) reported having received at least one dose of COVID-  
217 19 vaccine, and most had received two doses (2734/2818, 97%). Half of the healthcare workers received  
218 their first dose before the 30<sup>th</sup> of June 2021 (1399/2905, 48%). Sinopharm (1832/2818, 65%) was the

219 most frequently administered vaccine followed by Sinovac (817/2818, 29%); the remaining 2% had  
220 received Sputnik V.

221

222 Factors related to receiving vaccination after June 21 were geographical location, younger age, less than  
223 1 year in the current job (424/720, 58%), lower educational attainment, having no comorbidity,  
224 underweight or having a healthy BMI.

225

226

227

228 **Table 1: Baseline characteristics of healthcare workers accessing the occupational health**  
 229 **services stratified by time of COVID-19 vaccination.**  
 230

| Variables                       |                             | Early vaccination<br>(Feb 21 - June 21)<br>N (%) ‡ | Late vaccination<br>(after June 21)<br>N (%) ‡ | Non-vaccinated,<br>N (%) ‡ |
|---------------------------------|-----------------------------|----------------------------------------------------|------------------------------------------------|----------------------------|
|                                 | Total                       | 1399                                               | 1419                                           | 87                         |
| Sex                             | Male (n=704)                | 347 (49.3%)                                        | 338 (48.0%)                                    | 19 (2.7%)                  |
|                                 | Female (n=2001)             | 1,052 (47.8%)                                      | 1,081 (49.1%)                                  | 68 (3.1%)                  |
| Age (years)                     | < 30 (n=927)                | 314 (33.9%)                                        | 567 (61.2%)                                    | 44 (4.7%)                  |
|                                 | 30-40 (n=864)               | 413 (47.8%)                                        | 417 (48.3%)                                    | 30 (3.5%)                  |
|                                 | > 40 (n=1114)               | 672 (60.3%)                                        | 423 (38.0%)                                    | 13 (1.2%)                  |
| Role                            | Clinical (n=1726)           | 827 (47.9%)                                        | 838 (48.6%)                                    | 53 (3.1%)                  |
|                                 | Non-clinical (n=1179)       | 572 (48.5%)                                        | 569 (48.3%)                                    | 34 (2.9%)                  |
| Years at current role           | < 1 (n=548)                 | 102 (18.6%)                                        | 415 (75.6%)                                    | 31 (5.6%)                  |
|                                 | 1-5 (n=1172)                | 619 (52.5%)                                        | 523 (44.4%)                                    | 30 (2.5%)                  |
|                                 | 6-10 (n=447)                | 254 (56.8%)                                        | 183 (40.9%)                                    | 9 (2.0%)                   |
|                                 | > 10 (n=730)                | 424 (58.1%)                                        | 286 (39.2%)                                    | 16 (2.2%)                  |
| Number of known comorbidities   | None (n=2039)               | 900 (44.1%)                                        | 1,065 (52.2%)                                  | 64 (3.1%)                  |
|                                 | 1 (n=720)                   | 409 (56.8%)                                        | 291 (40.4%)                                    | 18 (2.5%)                  |
|                                 | > 1 (n=146)                 | 90 (61.6%)                                         | 51 (34.9%)                                     | 5 (3.4%)                   |
| History of SARS-CoV-2 infection | Yes (n=1063)                | 558 (52.5%)                                        | 478 (44.9%)                                    | 27 (2.5%)                  |
|                                 | No (n=1842)                 | 886 (48.1%)                                        | 881 (47.8%)                                    | 62 (3.4%)                  |
| Body mass index                 | Underweight (n=87)          | 36 (41.4%)                                         | 48 (55.2%)                                     | 3 (3.7%)                   |
|                                 | Healthy (n=971)             | 428 (44.1%)                                        | 504 (51.9%)                                    | 39 (4.0%)                  |
|                                 | Overweight (n=866)          | 425 (49.1%)                                        | 422 (48.7%)                                    | 19 (2.2%)                  |
|                                 | Obese (n=981)               | 510 (52.0%)                                        | 445 (45.4%)                                    | 26 (2.7%)                  |
| Highest level of education      | O-levels (n=1190)           | 555 (46.6%)                                        | 593 (49.8%)                                    | 42 (3.5%)                  |
|                                 | A-levels (n=350)            | 133 (38.0%)                                        | 206 (58.9%)                                    | 11 (3.1%)                  |
|                                 | Diploma (n=1015)            | 533 (52.5%)                                        | 452 (44.5%)                                    | 30 (3.0%)                  |
|                                 | University (n=350)          | 178 (50.9%)                                        | 168 (48.0%)                                    | 4 (1.1%)                   |
| Type of facility                | Primary (n=807)             | 460 (57.0%)                                        | 314 (38.9%)                                    | 33 (4.1%)                  |
|                                 | Secondary (n=757)           | 401 (53.0%)                                        | 335 (44.3%)                                    | 21 (2.8%)                  |
|                                 | Tertiary (n=1018)           | 392 (38.5%)                                        | 599 (58.8%)                                    | 27 (2.7%)                  |
|                                 | Quaternary (n=323)          | 146 (45.2%)                                        | 171 (52.9%)                                    | 6 (1.9%)                   |
| Administrative authority        | Local (n=1208)              | 669 (55.4%)                                        | 494 (40.9%)                                    | 45 (3.7%)                  |
|                                 | Government (n=1496)         | 591 (39.5%)                                        | 867 (57.9%)                                    | 38 (2.5%)                  |
|                                 | Mission or private (n=201)  | 139 (69.2%)                                        | 58 (28.9%)                                     | 4 (2.0%)                   |
| Province                        | Harare (n=1047)             | 587 (56.1%)                                        | 416 (39.7%)                                    | 44 (4.2%)                  |
|                                 | Bulawayo (n=406)            | 208 (51.2%)                                        | 191 (47.0%)                                    | 7 (1.7%)                   |
|                                 | Mashonaland East (n=262)    | 79 (30.2%)                                         | 175 (66.8%)                                    | 8 (3.1%)                   |
|                                 | Mashonaland West (n=202)    | 61 (30.2%)                                         | 135 (66.8%)                                    | 6 (3.0%)                   |
|                                 | Mashonaland Central (n=161) | 60 (37.3%)                                         | 96 (59.6%)                                     | 5 (3.1%)                   |
|                                 | Masvingo (n=165)            | 60 (36.4%)                                         | 98 (59.4%)                                     | 7 (4.2%)                   |
|                                 | Manicaland (n=162)          | 90 (55.6%)                                         | 70 (43.2%)                                     | 2 (1.2%)                   |
|                                 | Midlands (n=168)            | 72 (42.9%)                                         | 93 (55.4%)                                     | 3 (1.8%)                   |
|                                 | Matabeleland South (n=332)  | 182 (54.8%)                                        | 145 (43.7%)                                    | 5 (1.5%)                   |

231 ‡ =Row percentages

## 232 FACTORS INFLUENCING VACCINE UPTAKE

### 233 (Mis)Information

234 Participants generally felt that the government had run an effective information campaign using radio,  
235 television, billboards, and banners. The information provided, they felt, was reliable, accurate, and easy  
236 to understand, and included messages encouraging the population to get vaccinated. However, it was  
237 highlighted that information was not always communicated in all languages, which impacted the  
238 accessibility of information.

239 *“In terms of information I think they have done pretty well, maybe they will just put in all languages*  
240 *because at times you would go to get news and you see it will be written in Shona only, there is*  
241 *no Ndebele poster. It’s not everyone who will understand what they are saying. So, they should*  
242 *just try and put it in all languages so that everyone in their respective places they read and*  
243 *understand.” (Clinician, Late Receiver, Matabeleland North).*

244 Additionally, information about accessing the vaccine while breastfeeding, during pregnancy, and if HIV-  
245 positive was not consistent, especially at the start of the vaccination campaign.

246 *“I think the message wasn’t so clear [from the government], people had so many questions about*  
247 *the vaccine. Like who is eligible for the vaccines, for example at first it was said pregnant women*  
248 *are not supposed to be vaccinated. Like as healthcare workers you are just telling people that*  
249 *pregnant women should not be vaccinated but after some time, they say pregnant women are*  
250 *eligible. Already people are having some sort of confusion and others are still holding on to that*  
251 *old information. And I think that information they gave us it wasn’t really enough.” (Clinician, Early*  
252 *Receiver, Bulawayo)*

253 This was supported by the quantitative data (Fig 2) showing that the most frequently reported reason for  
254 not being vaccinated was pregnancy, breastfeeding or trying to conceive (34/87, 39%), followed by fear  
255 of side effects (13/87, 15%).

256

257

258 **Fig 2. Bar graph showing reasons for no COVID-19 vaccination among healthcare workers (N=87)**  
259 **based on the 5Cs of hesitancy model [30].**

260

261 While some participants felt that the government had provided reliable information about the vaccines,  
262 most participants reported the internet and social media being their main sources of information.  
263 However, they acknowledged that these sources also spread false information. It was felt that  
264 misinformation was an important factor preventing or hindering people to get vaccinated.

265 *“That social media news, that maybe today 100 people got vaccinated and they all died or 3 days*  
266 *after vaccination they died, or they reacted badly or something. Very much impact it had because*  
267 *I delayed getting my vaccine for so long to an extent that I got my vaccination by the time when*  
268 *the government was like, if you don’t get vaccinated you will be kicked out of work or school or*  
269 *something.” (Clinician, Late Receiver, Matabeleland South)*

270

271

## 272 **Religion**

273 According to respondents, religion is critically important for many people in Zimbabwe and religious  
274 leaders were actively involved in the vaccination campaign. Almost three quarters of healthcare workers  
275 (2123/2905, 73%) believed that their community leaders and/or religious leaders would want them to get  
276 vaccinated. There was no difference in the proportion of healthcare workers who responded affirmatively  
277 to having received the vaccine by age, sex, province, or professional role.

278 However, despite healthcare workers reporting quantitatively that their religious leaders had no  
279 reservations about or were in favor of vaccinations, the qualitative data revealed that some churches did  
280 in fact have reservations:

281           *“For some churches they are in between because they could not reverse what was being said*  
282           *officially, they would say go and get vaccinated but deep-down people would be saying we can’t*  
283           *get a vaccine that we don’t understand” (Clinician, Late Receiver, Harare).*

284   Some healthcare workers felt that select church leaders did not encourage vaccination and were rather  
285   negative towards COVID-19 vaccines. Participants reported that some churches, specifically the  
286   Pentecostal churches and the Apostolic, claimed that their followers “...*will be protected by the Holy*  
287   *Spirit.*” (Clinician, Early Receiver, Harare). One participant said that they had heard church leaders  
288   preaching that:

289           *“...the vaccine is for the triple six, so much so that even up to now, some people have not*  
290           *taken up the vaccine, because they think it’s satanism” (Clinician, Late Receiver, Harare).*

291   Important myths included the risk of death two years after receiving the vaccine, an association between  
292   COVID-19 vaccines and satanism, and the perception that COVID-19 vaccines were the “*mark of the*  
293   *beast*”. One respondent reported that he had been led to believe that:

294           *“...you die after 2 years. They were saying the injection has a period of survival just for 2 years.*  
295           *Then you die after 2 years that is what people were saying” (Non-clinician, Early Receiver,*  
296           *Harare).*

### 297   **Perceptions of vaccine efficacy and safety**

298   Generally, healthcare workers perceived the vaccine as ‘moderately safe’ (1180/2905, 41%) or ‘very safe’  
299   (1529/2905, 53%). Older HCWs ( $\geq 40$  years) were more likely to perceive COVID-19 vaccines as very  
300   safe (649/1083, 60%) compared to those  $< 40$  years old (880/1745, 50%).

301   When probing for detail, healthcare workers voiced some concerns regarding vaccine safety, specifically  
302   due to side effects. While none of the interviewed healthcare workers had experienced side effects  
303   themselves, they said that some of their friends, colleagues, and family members had experienced  
304   symptoms which they believed were due to vaccination.

305 *“[L]ike there is this nurse that I saw, she had a reaction; she had some sort of funny reaction as*  
306 *if it was like burns. I don’t know but she had a reaction, so that on its own is a push factor. She*  
307 *had some complications, and she was admitted, that’s a push factor, when people tell you that*  
308 *they have reacted”.* (Clinician, Early Receiver, Bulawayo)

309 The origin (China) of the vaccine was also raised as a cause of concern, specifically because China was  
310 the origin of the pandemic and due to theories that the pandemic was man-made.

311 *“The fact that our vaccine came from China and yet the disease itself, started in China. It seemed*  
312 *like the vaccine coming from China, there are motives to kill us all. That’s how it seemed, why*  
313 *did the vaccine come from China?.... From everyone, everyone was just concerned about how*  
314 *people died in China and how the disease started. Then it said they have found a vaccine, yet*  
315 *the disease was from there. There were stories that the disease was man made.”* (Clinician, Late  
316 *Receiver, Manicaland).*

317 Reports of break-through infections further decreased the confidence into the vaccine. Participants  
318 questioned the effectiveness of the vaccine:

319 *“Yes, after being vaccinated. I was talking to one nurse who was saying she wasn’t feeling well.*  
320 *I hadn’t seen her in a long time, and I asked her where she had gone and she said she had*  
321 *been sick, COVID-19. I asked her if she had been vaccinated and she said she was*  
322 *vaccinated, you could see that she was doubting the vaccine. And there are some who were*  
323 *never vaccinated but up to now they have never been diagnosed of COVID-19”* (Clinician, Late  
324 *Receiver, Harare).*

325

### 326 **SARS-CoV-2 infection an occupational risk**

327 The risk of severe infection and death was seen as a real possibility and motivation for taking up the  
328 vaccine. Healthcare workers felt that they were at a heightened risk of contracting the infection because  
329 of the nature of their work. The vaccine was seen as an extra layer of protection (an alternative or

330 additional “personal protective equipment”) in situations where there was a breakdown of infection  
331 prevention and control because people around them were not adhering to prevention and control  
332 measures.

333 *“The risk of getting COVID-19 here is very high. As individual who works in the outpatient’s*  
334 *department. We are the ones that welcome patients. We are the face of the hospital that receive*  
335 *patients even if they do then go to the wards, but patients come through our hands first, whether*  
336 *positive or negative.” (Clinician, Late Receiver, Manicaland)*

337 *“And then pull factors that thing that you are working with people that are suffering from COVID-*  
338 *19. And you have nothing to protect yourself, you just feel that you have to go and get*  
339 *vaccinated.” (Clinician, Early Receiver, Bulawayo)*

340 Risk of infection was perceived to be omnipresent. Healthcare workers felt unsafe even away from work  
341 because of transmission in the community. What put them at additional risk in the community (over and  
342 above other people) was that community members frequently visited their homes to seek health advice  
343 (because they were healthcare workers).

344 People with chronic disease such as HIV and diabetes felt even more vulnerable and hence were anxious  
345 to get vaccinated as early as possible.

346 *“I can easily contract it because of my condition, that I am HIV positive, so we are at risk of*  
347 *contracting a lot of diseases. Because our immune system is weak and is unable to fight strong*  
348 *infections. So that risk makes me afraid that I can contract COVID-19” (Non-clinician, Early*  
349 *Receiver, Harare).*

350

### 351 **Employment and access to services**

352 Some institutions, especially those run by the government, mandated their employees to be vaccinated.  
353 In addition, statements were made that unvaccinated people would not be paid or denied entry into  
354 workplaces. Some people accessed vaccination because of work requirements.



355 *“A lot of people are being pushed [into being vaccinated] by work because a lot of institutions are*  
356 *saying if you are not vaccinated then we won’t hire you, so that ends up pushing people.” (Non-*  
357 *clinician, Early Receiver, Harare).*

358 *“Yes, I have seen people come saying ‘I work for a private company. So, they are saying they want*  
359 *everyone vaccinated. If you are not vaccinated, you won’t work.” (Clinician, Early Receiver,*  
360 *Bulawayo).*

361 Also, it was felt that vaccination was mandatory to access various services and institutions. Such  
362 institutions included hospitals, churches, and subsidised transport. Some believed that *“nowadays you*  
363 *cannot do anything without being vaccinated,”* (Clinician, Early Receiver, Harare).

364 *“Some of the push factors are that maybe they say that if you are not vaccinated you will not*  
365 *board the ZUPCO buses or that you won’t be able to enter into the supermarket. Or you won’t*  
366 *be able to go to the bar or you won’t be able to travel from Harare to Bulawayo or Harare to*  
367 *Mutare. Without the vaccination card I feel these are some of the things that will influence people*  
368 *to get vaccinated” (Non-clinician, Early Receiver, Harare).*

369

370

### 371 **Other people’s experiences and recommendation for vaccination**

372 More cautious participants initially delayed vaccination to observe what would happen to those who were  
373 vaccinated. The experience of other co-workers, particularly seniors (managers and supervisors), friends,  
374 and relatives and their encouragements had great influence on vaccine uptake.

375 *“So, I was one of those people that wanted to wait and see what happens to those that have*  
376 *been vaccinated in 5 years. But because seeing that those vaccinated were not having any side*  
377 *effects I just decided to be vaccinated” (Clinician, Late Receiver, Mashonaland Central).*

378           *“Because most of my peers have been vaccinated and they have been encouraging me to get*  
379           *vaccinated. So, if I make that decision, they will be happy.” (Clinician, Never Vaccinated,*  
380           *Mashonaland Central).*

381 With vaccines becoming more widely available and the number of vaccinations administered increasing,  
382 people were less reluctant to receive their vaccine: *“because they discovered nothing [wrong] was going*  
383 *on with them [the vaccinated]”, (Clinician, Late Receiver, Harare).*

384  
385 Even though some healthcare workers were initially reluctant and based their decisions to get vaccinate  
386 on first observing the outcomes of their vaccinated clients, at the time of the survey a high proportion of  
387 healthcare workers (2688/2905, 92%) said that they would recommend COVID-19 vaccine to eligible  
388 patients. About three quarters of the healthcare workers (2106/2828, 74.4%) thought most of their close  
389 family members and friends would want them to get a COVID-19 vaccine. One healthcare worker said:

390           *“I would also recommend. I think because it didn’t give me any problems and maybe the fact*  
391           *that from what I have been hearing that, if you are not vaccinated and if you catch COVID it*  
392           *might be less severe. So, I would recommend.” (Clinician, Early Receiver, Bulawayo).*

393

394

395

### 396 **Vaccine availability and access**

397 According to healthcare workers, provision of vaccine services at health facilities prolonged waiting times  
398 for vaccination and other services. Vaccine stocks were sometimes running low and thus people who  
399 attended the service for their first shot were turned away as available vaccines were reserved for those  
400 attending to receive the second vaccine dose. Though vaccines were eventually delivered to all  
401 provinces, initially vaccines were only available in selected approved health facilities in Harare and  
402 Bulawayo.

403 *“It’s not always available, sometimes it runs out. Sometimes they say they have run out of first*  
404 *dose; they only have second dose so its vice versa.” (Clinician, Late Receiver, Harare)*

405 *“There was a time when the first dose was not available, but the second was always there. Some*  
406 *time back at the beginning it was available, but there came a time when it was no longer*  
407 *available.” (Clinician, Early Receiver, Harare).*

408 However as for healthcare workers themselves, very few reported that the reason for not getting  
409 vaccinated were logistical reasons such as long waiting time 9% (n=8) and vaccine stocks 1% (n=1).

410

## 411 **DISCUSSION**

412 In this mixed-method study we explored COVID-19 vaccine uptake among healthcare workers in  
413 Zimbabwe. Understanding vaccine uptake and the reasons behind it, as well as remaining concerns that  
414 were not adequately addressed, is important for developing new vaccine approaches. With WHO  
415 declaring COVID-19 as no longer constituting a global health emergency, vaccine strategies have  
416 changed accordingly. Nonetheless, in these new strategies healthcare workers remain a key target  
417 population, with the Africa CDC’s proposed “100-100-70” targeting the vaccination of 100% of healthcare  
418 workers [18]. Achieving these ambitious targets will require careful appraisal of successes, challenges,  
419 and opportunities for improved vaccination coverage.

420

421 The remarkably high (>97%) prevalence of self-reported COVID-19 vaccine uptake in our study is in stark  
422 contrast to other studies from Africa which reported COVID-19 vaccine coverage of 33% and 90% in two  
423 settings in Nigeria, respectively, 49% in Somalia, 62% in Ethiopia, 69% in Uganda [31–35]. The main  
424 reasons for not being vaccinated in these studies were safety concerns, fear of side effects, and non-  
425 availability of the vaccine. A more granular analysis of our results revealed that time of uptake (i.e.,  
426 whether a person received a vaccine ‘early’ or ‘late’) was influenced by geographical location, known  
427 chronic conditions, level of education, and professional role. However, overall, there were no clear

428 demographic or behavioral predictors of receiving the vaccine 'early' or 'late' above the patterns of  
429 availability and access within the country. For instance, the Bulawayo and Harare provinces, the primary  
430 'hotspots' of the epidemic, received the vaccine first [36], largely due to vaccine supply and availability,  
431 which likely influenced who got the vaccine early or late among provinces and hence among the  
432 healthcare workers participating in this study. This country-level distribution strategy was in itself shaped  
433 by the wider geopolitical situation, notably global vaccine inequality, bilateral arrangement with China,  
434 and erratic vaccine supply [37]. Despite high overall rates of vaccination, these inequities and access-  
435 related challenges were evidently at play in our research within the Zimbabwean context.

436

437

438 Beyond the broader patterns of access, availability, and distribution, we identified several socio-  
439 behavioural influencers that contributed to a comparatively high vaccine uptake. First, many of the  
440 healthcare workers felt that the vaccination campaign was effective and paired with well-designed  
441 information, education, and communication. Good communication from formal channels helped alleviate  
442 concerns and counter misinformation. This perception was not without exception or reservations,  
443 however, as one of the main reasons for not getting vaccinated among healthcare workers was  
444 pregnancy, suggesting that there were key gaps and inconsistencies in information being provided.  
445 Information was also noted as not provided in Zimbabwean local languages, which may not have  
446 impacted healthcare workers uptake (who are trained in English) but may have impact on uptake among  
447 the general population.

448

449 Moreover, concerns about the vaccine were certainly present among healthcare workers. Participants  
450 expressed concerns about the vaccine's origin, the speed taken to develop which led to safety and  
451 efficacy concerns. These concerns were clearly amplified by rumours and misinformation that were rife  
452 during the pandemic, as highlighted by many of our participants. Studies elsewhere have shown the

453 influence of COVID-19 misinformation on public confidence, leading to vaccine scepticism [38,39]. In our  
454 study, social media and religious leaders were considered to be important opinion leaders and spreaders  
455 of (mis)information among the community. The wide influence of religious leaders highlights the  
456 importance of engaging them in health-related matters and specifically on vaccinations. While our findings  
457 show that misinformation did not hugely affect the vaccine uptake among healthcare workers as in other  
458 settings [38,40], these concerns need to be taken seriously in future risk communication and community  
459 engagement (RCCE) strategies. Healthcare workers are considered a source of trusted information for  
460 the community and hence gatekeepers to high vaccination coverage of the general population.

461

462 A second main reason behind high uptake in our study is explained by healthcare workers' occupational  
463 risk perception. In a study which examined the relationship between risk perception, vaccine trust, and  
464 vaccine uptake the authors found that perceived risk of SARS-CoV-2 infection increased COVID-19  
465 vaccination by 1.6 times [41]. In our study, healthcare workers felt vulnerable to SARS-CoV-2 infections  
466 and because they believed that vaccines were generally safe, they then got vaccinated. In the absence  
467 of adequate personal protective equipment, healthcare workers viewed COVID-19 vaccination as an  
468 extra layer of protection. Generally, those who were objectively at higher risk of severe disease (such as  
469 older people, people with obesity and/or co-morbidities) were more likely to be vaccinated earlier. This  
470 may be due to their own perceived higher risk, or it may be due to initial prioritisation of these at-risk  
471 groups among healthcare workers and also an effect of the RCCE campaign.

472

473 Finally, and perhaps most influential of all, mandatory vaccination policies, though not stringently applied,  
474 influenced the vaccine uptake among healthcare workers in Zimbabwe. 'Mandatory vaccination' is  
475 defined as 'a policy that establishes a requirement that an individual be vaccinated based on their status  
476 or their eligibility to access societal or governmental benefits' [42]. Mandatory vaccination can be effective  
477 in increasing uptake as found in other settings such as Somalia, and Uganda [32,33]. However, such a

478 strategy has the potential to undermine trust of both the vaccine but also the authority mandating  
479 vaccination. While stringent lockdowns and mandatory vaccination may have been acceptable during a  
480 time of intense COVID-19 transmission, high infection and case-fatality rates, such measures are unlikely  
481 to be acceptable in the post COVID-19 emergency era. Mandatory vaccination most certainly does not  
482 solve often quite legitimate concerns people may have about new vaccines and treatment but may  
483 exacerbate them [43]. Therefore, mandating vaccination needs to be carefully balanced with other  
484 interventions. It might be noted that historically, Zimbabwe achieved high vaccine uptake across different  
485 vaccination programs including Expanded Program on Immunization for children, typhoid conjugate  
486 vaccine (84.5% for children and adults and human papilloma virus vaccine (88-94%) for young adults  
487 [44,45]. Mandatory vaccine policies were not in place for these other vaccine-preventable diseases.

488

489 As our study and several others have shown [46–49], healthcare workers are not simply passive  
490 participants of a vaccination campaign, as seen by their calculated risk assessments and astute socio-  
491 political observations. Given their centrality to current and future vaccine policy, their active involvement  
492 in the development of strategies is key, especially in addressing legitimate concerns which can be  
493 packaged in RCCE activities. Increasing vaccine choices and transparency on adverse effects after  
494 immunization through surveillance is likely to address healthcare workers' legitimate concerns and  
495 anxieties. Beyond healthcare workers, misinformation disseminated on social media should be  
496 addressed proactively by working with influencers such as religious leaders and public figures.

497

498 The strengths of this study lie in the use of a mixed-method approach investigating self-reported vaccine  
499 uptake and associated reasons. The sample size was large both with regards to the number of healthcare  
500 workers included and the number of health facilities, with the latter including a diverse range of health  
501 facilities from tertiary to primary level and across different provinces. The limitations include that  
502 vaccination was self-reported and not verified by checking vaccination cards and thus may have been

503 subject to social desirability and/or recall bias (specifically the date of vaccination). Also, healthcare  
504 workers were self-selected from those who came forward to access the health check-up service. This  
505 may have introduced selection bias as those healthcare workers who took up the health check service  
506 may have been more health conscious and thus more likely to be vaccinated.

507

## 508 **Conclusion**

509 In conclusion, vaccine uptake among healthcare workers in Zimbabwe is high despite the limited vaccine  
510 choices, misinformation, hesitancy, and health systems challenges. The key factors positively affecting  
511 uptake were a generally well organised information and communication campaign (with certain  
512 limitations) and occupational risk perception coupled with 'mandatory vaccination'. (Mis)information on  
513 social media and through religious leaders as well as vaccine-related logistics were also thought to be  
514 important. Active engagement of healthcare workers in vaccine strategy is crucial for understanding  
515 current concerns and for developing context-sensitive strategies that address remaining concerns of  
516 healthcare workers and wider population.

517

## 518 **Conflicts of interest**

519 None declared.

520

## 521 **Funding statement**

522 This work was supported by the Global Public Health strand of the Elizabeth Blackwell Institute for Health  
523 Research, funded under the University of Bristol's QR GCRF strategy (ref:H100004-148) as well as  
524 support from Sheffield and Oxford QR-GCRF funds. It was supported by UK aid from the UK government  
525 (FCDO) (ref 668 303), and by funding from the government of Canada. The views expressed do not  
526 necessarily reflect the policies of the respective governments. RAF is funded by a Wellcome Trust Senior  
527 Fellowship (206316\_Z\_17\_Z). IDO has received funding through the Wellcome Trust Clinical PhD

528 Programme awarded to the London School of Hygiene & Tropical Medicine (grant number  
529 203905/Z/16/Z). The funders had no role in study design, data collection and analysis, decision to publish,  
530 or preparation of the manuscript.

531

532 Tinotenda Taruvinga is supported by the Fogarty International Centre of the National Institutes of Health  
533 (NIM; Bethesda, Maryland, MD, USA) under Award Number *D43 TW009539*. The content therein is solely  
534 the responsibility of the authors and does not necessarily represent the official views of the  
535 National Institutes of Health.

536

### 537 **Acknowledgements**

538 The study would like to acknowledge the support from Professor John Metcalfe, Ms. Thokozile Mashaah,  
539 Mrs. Lillian Mususa, and the BRTI team and most importantly the participants who spared their time to  
540 share this valuable experience.

541



## 542 REFERENCES

- 543 1. Jara A, Undurraga EA, Zubizarreta JR, González C, Pizarro A, Acevedo J, et al. Effectiveness of  
544 homologous and heterologous booster doses for an inactivated SARS-CoV-2 vaccine: a large-scale  
545 prospective cohort study. *Lancet Glob Health*. 2022;10: e798–e806. doi:10.1016/S2214-109X(22)00112-7
- 546 2. Lopez Bernal J, Andrews N, Gower C, Robertson C, Stowe J, Tessier E, et al. Effectiveness of the Pfizer-  
547 BioNTech and Oxford-AstraZeneca vaccines on covid-19 related symptoms, hospital admissions, and  
548 mortality in older adults in England: test negative case-control study. *BMJ*. 2021; n1088.  
549 doi:10.1136/bmj.n1088
- 550 3. Self WH, Tenforde MW, Rhoads JP, Gaglani M, Ginde AA, Douin DJ, et al. Comparative Effectiveness of  
551 Moderna, Pfizer-BioNTech, and Janssen (Johnson & Johnson) Vaccines in Preventing COVID-19  
552 Hospitalizations Among Adults Without Immunocompromising Conditions — United States, March–August  
553 2021. *MMWR Morb Mortal Wkly Rep*. 2021;70: 1337–1343. doi:10.15585/mmwr.mm7038e1
- 554 4. Mutombo PN, Fallah MP, Munodawafa D, Kabel A, Houeto D, Goronga T, et al. COVID-19 vaccine  
555 hesitancy in Africa: a call to action. *Lancet Glob Health*. 2022;10: e320–e321. doi:10.1016/S2214-  
556 109X(21)00563-5
- 557 5. Ayenigbara IO, Adegboro JS, Ayenigbara GO, Adeleke OR, Olofintuyi OO. The challenges to a successful  
558 COVID-19 vaccination programme in Africa. *Germes*. 2021;11: 427–440. doi:10.18683/germes.2021.1280
- 559 6. Murewanhema G, Musuka G, Denhere K, Chingombe I, Mappingure MP, Dzinamarira T. The Landscape of  
560 COVID-19 Vaccination in Zimbabwe: A Narrative Review and Analysis of the Strengths, Weaknesses,  
561 Opportunities and Threats of the Programme. *Vaccines*. 2022;10: 1–11. doi:10.3390/vaccines10020262
- 562 7. Ogunleye OO, Godman B, Fadare JO, Mudenda S, Adeoti AO, Yinka-Ogunleye AF, et al. Coronavirus  
563 Disease 2019 (COVID-19) Pandemic across Africa: Current Status of Vaccinations and Implications for the  
564 Future. *Vaccines*. 2022;10: 1553. doi:10.3390/vaccines10091553
- 565 8. Tlotleng N, Cohen C, Made F, Kootbodien T, Masha M, Naicker N, et al. COVID-19 hospital admissions  
566 and mortality among healthcare workers in South Africa, 2020–2021. *IJID Reg*. 2022;5: 54–61.  
567 doi:10.1016/j.ijregi.2022.08.014
- 568 9. Peterson CJ, Lee B, Nugent K. COVID-19 Vaccination Hesitancy among Healthcare Workers—A Review.  
569 *Vaccines*. 2022;10: 948. doi:10.3390/vaccines10060948
- 570 10. Ferland L, Carvalho C, Gomes Dias J, Lamb F, Adlhoch C, Suetens C, et al. Risk of hospitalization and  
571 death for healthcare workers with COVID-19 in nine European countries, January 2020–January 2021. *J*  
572 *Hosp Infect*. 2022;119: 170–174. doi:10.1016/j.jhin.2021.10.015
- 573 11. Sarkar MK, Babu TA, Dey S, Upparakadiyala R, Lingaiah P, Venugopal V. Front-Line vs Second-Line  
574 Healthcare Workers: Susceptibility Prediction to COVID-19 Infection in a Tertiary Care Teaching Institute.  
575 *Cureus*. 2023;15. doi:10.7759/cureus.37915
- 576 12. Galanis P, Vraka I, Katsiroumpa A, Siskou O, Konstantakopoulou O, Katsoulas T, et al. COVID-19  
577 Vaccine Uptake among Healthcare Workers: A Systematic Review and Meta-Analysis. *Vaccines*. 2022;10:  
578 1637. doi:10.3390/vaccines10101637
- 579 13. Alame M, Kaddoura M, Kharroubi S, Ezzeddine F, Hassan G, Diab El-Harakeh M, et al. Uptake rates,  
580 knowledge, attitudes, and practices toward seasonal influenza vaccination among healthcare workers in  
581 Lebanon. *Hum Vaccines Immunother*. 2021;17: 4623–4631. doi:10.1080/21645515.2021.1948783

- 582 14. Sevidzem Wirsy F, Nkfusai NC, Ebot Ako-Arrey D, Kenfack Dongmo E, Titu Manjong F, Nambile Cumber  
583 S. Acceptability of COVID-19 Vaccine in Africa. *Int J Matern Child Health AIDS IJMA*. 2021;10: 134–138.  
584 doi:10.21106/ijma.482
- 585 15. Karafillakis E, Dinca I, Apfel F, Cecconi S, Würz A, Takacs J, et al. Vaccine hesitancy among healthcare  
586 workers in Europe: A qualitative study. *Vaccine*. 2016;34: 5013–5020. doi:10.1016/j.vaccine.2016.08.029
- 587 16. McAbee L, Tapera O, Kanyangarara M. Factors Associated with COVID-19 Vaccine Intentions in Eastern  
588 Zimbabwe: A Cross-Sectional Study. *Vaccines*. 2021;9: 1109. doi:10.3390/vaccines9101109
- 589 17. Statement on the fifteenth meeting of the IHR (2005) Emergency Committee on the COVID-19 pandemic.  
590 [cited 29 May 2023]. Available: [https://www.who.int/news/item/05-05-2023-statement-on-the-fifteenth-](https://www.who.int/news/item/05-05-2023-statement-on-the-fifteenth-meeting-of-the-international-health-regulations-(2005)-emergency-committee-regarding-the-coronavirus-disease-(covid-19)-pandemic)  
591 [meeting-of-the-international-health-regulations-\(2005\)-emergency-committee-regarding-the-coronavirus-](https://www.who.int/news/item/05-05-2023-statement-on-the-fifteenth-meeting-of-the-international-health-regulations-(2005)-emergency-committee-regarding-the-coronavirus-disease-(covid-19)-pandemic)  
592 [disease-\(covid-19\)-pandemic](https://www.who.int/news/item/05-05-2023-statement-on-the-fifteenth-meeting-of-the-international-health-regulations-(2005)-emergency-committee-regarding-the-coronavirus-disease-(covid-19)-pandemic)
- 593 18. Acceleration and Integration: A Progressive Approach for Saving Lives and Livelihoods. In: Africa CDC  
594 [Internet]. [cited 29 May 2023]. Available: [https://africacdc.org/news-item/acceleration-and-integration-a-](https://africacdc.org/news-item/acceleration-and-integration-a-progressive-approach-for-saving-lives-and-livelihoods/)  
595 [progressive-approach-for-saving-lives-and-livelihoods/](https://africacdc.org/news-item/acceleration-and-integration-a-progressive-approach-for-saving-lives-and-livelihoods/)
- 596 19. Kavenga F, Rickman HM, Chingono R, Tarvinga T, Marembo T, Manasa J, et al. Comprehensive  
597 occupational health services for healthcare workers in Zimbabwe during the SARS-CoV-2 pandemic.  
598 *PLOS ONE*. 2021;16: e0260261. doi:10.1371/journal.pone.0260261
- 599 20. Maulani N, Nyadera IN, Wandekha B. The generals and the war against COVID-19: The case of  
600 Zimbabwe. *J Glob Health*. 10: 020388. doi:10.7189/jogh.10.020388
- 601 21. Tom T, Chipenda C. COVID-19, Lockdown and the Family in Zimbabwe. *J Comp Fam Stud*. 2020;51:  
602 288–300. doi:10.3138/jcfs.51.3-4.005
- 603 22. Banda Chitsamatanga B, Malinga W. ‘A tale of two paradoxes in response to COVID-19’: Public health  
604 system and socio-economic implications of the pandemic in South Africa and Zimbabwe. Serpa S, editor.  
605 *Cogent Soc Sci*. 2021;7: 1869368. doi:10.1080/23311886.2020.1869368
- 606 23. Mavhunga C. Zimbabwe Rolls Out Coronavirus Vaccination Program. In: VOA [Internet]. 18 Feb 2021  
607 [cited 8 Jun 2023]. Available: [https://www.voanews.com/a/covid-19-pandemic\\_zimbabwe-rolls-out-](https://www.voanews.com/a/covid-19-pandemic_zimbabwe-rolls-out-coronavirus-vaccination-program/6202235.html)  
608 [coronavirus-vaccination-program/6202235.html](https://www.voanews.com/a/covid-19-pandemic_zimbabwe-rolls-out-coronavirus-vaccination-program/6202235.html)
- 609 24. Independent T. Zimbabwe to start administering booster doses as omicron variant sets in. In: The  
610 Independent Uganda: [Internet]. 4 Dec 2021 [cited 8 Jun 2023]. Available:  
611 <https://www.independent.co.ug/zimbabwe-to-start-administering-booster-doses-as-omicron-variant-sets-in/>
- 612 25. WHO lists additional COVID-19 vaccine for emergency use and issues interim policy recommendations.  
613 [cited 8 Jun 2023]. Available: [https://www.who.int/news/item/07-05-2021-who-lists-additional-covid-19-](https://www.who.int/news/item/07-05-2021-who-lists-additional-covid-19-vaccine-for-emergency-use-and-issues-interim-policy-recommendations)  
614 [vaccine-for-emergency-use-and-issues-interim-policy-recommendations](https://www.who.int/news/item/07-05-2021-who-lists-additional-covid-19-vaccine-for-emergency-use-and-issues-interim-policy-recommendations)
- 615 26. Zimbabwe authorises Sputnik V, Sinovac coronavirus vaccines for emergency use. Reuters. 10 Mar 2021.  
616 Available: <https://www.reuters.com/article/uk-health-coronavirus-zimbabwe-vaccine-idUSKBN2B20K3>.  
617 Accessed 8 Jun 2023.
- 618 27. Reuters. Zimbabwe approves J&J COVID-19 vaccine for emergency use. Reuters. 28 Jul 2021. Available:  
619 [https://www.reuters.com/business/healthcare-pharmaceuticals/zimbabwe-approves-jj-covid-19-vaccine-](https://www.reuters.com/business/healthcare-pharmaceuticals/zimbabwe-approves-jj-covid-19-vaccine-emergency-use-2021-07-28/)  
620 [emergency-use-2021-07-28/](https://www.reuters.com/business/healthcare-pharmaceuticals/zimbabwe-approves-jj-covid-19-vaccine-emergency-use-2021-07-28/). Accessed 8 Jun 2023.
- 621 28. Ministry of Health and Child Care - Latest Updates. [cited 29 May 2023]. Available:  
622 <http://www.mohcc.gov.zw/>

- 623 29. Charmaz K. *Constructing Grounded Theory: A Practical Guide Through Qualitative Analysis*. SAGE; 2006.
- 624 30. Razai MS, Oakeshott P, Esmail A, Wiysonge CS, Viswanath K, Mills MC. COVID-19 vaccine hesitancy:  
625 the five Cs to tackle behavioural and sociodemographic factors. *J R Soc Med*. 2021;114: 295–298.  
626 doi:10.1177/01410768211018951
- 627 31. Agha S, Chine A, Lalika M, Pandey S, Seth A, Wiyeh A, et al. Drivers of COVID-19 Vaccine Uptake  
628 amongst Healthcare Workers (HCWs) in Nigeria. *Vaccines*. 2021;9: 1162. doi:10.3390/vaccines9101162
- 629 32. Dahie HA, Mohamoud JH, Adam MH, Garba B, Dirie NI, Sh. Nur MA, et al. COVID-19 Vaccine Coverage  
630 and Potential Drivers of Vaccine Uptake among Healthcare Workers in SOMALIA: A Cross-Sectional  
631 Study. *Vaccines*. 2022;10: 1116. doi:10.3390/vaccines10071116
- 632 33. Akech GM, Kanyike AM, Nassozi AG, Aguti B, Nakawuki AW, Kimbugwe D, et al. COVID-19 Vaccination  
633 Uptake and Self-Reported Side Effects among Healthcare Workers in Mbale City Eastern Uganda.  
634 *Infectious Diseases (except HIV/AIDS)*; 2022 Jul. doi:10.1101/2022.07.11.22277490
- 635 34. Rikitu Terefa D, Shama AT, Feyisa BR, Ewunetu Desisa A, Geta ET, Chego Cheme M, et al. COVID-19  
636 Vaccine Uptake and Associated Factors Among Health Professionals in Ethiopia. *Infect Drug Resist*.  
637 2021;14: 5531–5541. doi:10.2147/IDR.S344647
- 638 35. Abubakar AT, Suleiman K, Ahmad SI, Suleiman SY, Ibrahim UB, Suleiman BA, et al. Acceptance of  
639 COVID-19 vaccine among healthcare workers in Katsina state, Northwest Nigeria. *Public and Global  
640 Health*; 2022 Mar. doi:10.1101/2022.03.20.22272677
- 641 36. Zimbabwe N. Bulawayo Ready To Kick-Start Vaccination After Covid-19 Jab Delivery. In:  
642 *NewZimbabwe.com* [Internet]. 20 Feb 2021 [cited 3 Jun 2023]. Available:  
643 <https://www.newzimbabwe.com/bulawayo-ready-to-kick-start-vaccination-after-covid-19-jab-delivery/>
- 644 37. Schryer-Roy A-M, Lenard K. New Study Shows Rich Country Shopping Spree for COVID-19 Vaccines  
645 Could Mean Fewer Vaccinations for Billions in Low-Income Countries.
- 646 38. Ennab F, Babar MS, Khan AR, Mittal RJ, Nawaz FA, Essar MY, et al. Implications of social media  
647 misinformation on COVID-19 vaccine confidence among pregnant women in Africa. *Clin Epidemiol Glob  
648 Health*. 2022;14: 100981. doi:10.1016/j.cegh.2022.100981
- 649 39. Loomba S, de Figueiredo A, Piatek SJ, de Graaf K, Larson HJ. Measuring the impact of COVID-19  
650 vaccine misinformation on vaccination intent in the UK and USA. *Nat Hum Behav*. 2021;5: 337–348.  
651 doi:10.1038/s41562-021-01056-1
- 652 40. Skafle I, Nordahl-Hansen A, Quintana DS, Wynn R, Gabarron E. Misinformation About COVID-19  
653 Vaccines on Social Media: Rapid Review. *J Med Internet Res*. 2022;24: e37367. doi:10.2196/37367
- 654 41. Wang J, Lu X, Lai X, Lyu Y, Zhang H, Fenghuang Y, et al. The Changing Acceptance of COVID-19  
655 Vaccination in Different Epidemic Phases in China: A Longitudinal Study. *Vaccines*. 2021;9: 191.  
656 doi:10.3390/vaccines9030191
- 657 42. Blank C, Gemeinhart N, Dunagan WC, Babcock HM. Mandatory employee vaccination as a strategy for  
658 early and comprehensive health care personnel immunization coverage: Experience from 10 influenza  
659 seasons. *Am J Infect Control*. 2020;48: 1133–1138. doi:10.1016/j.ajic.2020.01.015
- 660 43. Leach M, MacGregor H, Akello G, Babawo L, Baluku M, Desclaux A, et al. Vaccine anxieties, vaccine  
661 preparedness: Perspectives from Africa in a Covid-19 era. *Soc Sci Med*. 2022;298: 114826.  
662 doi:10.1016/j.socscimed.2022.114826

- 663 44. Poncin M, Marembo J, Chitando P, Sreenivasan N, Makwara I, Machekanyanga Z, et al. Implementation  
664 of an outbreak response vaccination campaign with typhoid conjugate vaccine – Harare, Zimbabwe, 2019.  
665 *Vaccine X*. 2022;12: 100201. doi:10.1016/j.jvacx.2022.100201
- 666 45. LaMontagne DS, Manangazira P, Marembo J, Chigodo C, Zvamashakwe C, Tshuma E, et al. HPV  
667 vaccination coverage in three districts in Zimbabwe following national introduction of 0,12 month schedule  
668 among 10 to 14 year old girls. *Vaccine*. 2022;40: A58–A66. doi:10.1016/j.vaccine.2021.07.012
- 669 46. Crawshaw J, Konnyu K, Castillo G, van Allen Z, Grimshaw JM, Presseau J. Behavioural determinants of  
670 COVID-19 vaccination acceptance among healthcare workers: a rapid review. *Public Health*. 2022;210:  
671 123–133. doi:10.1016/j.puhe.2022.06.003
- 672 47. Bauernfeind S, Hitzenbichler F, Huppertz G, Zeman F, Koller M, Schmidt B, et al. Brief report: attitudes  
673 towards Covid-19 vaccination among hospital employees in a tertiary care university hospital in Germany  
674 in December 2020. *Infection*. 2021;49: 1307–1311. doi:10.1007/s15010-021-01622-9
- 675 48. Chew NWS, Cheong C, Kong G, Phua K, Ngiam JN, Tan BYQ, et al. An Asia-Pacific study on healthcare  
676 workers' perceptions of, and willingness to receive, the COVID-19 vaccination. *Int J Infect Dis*. 2021;106:  
677 52–60. doi:10.1016/j.ijid.2021.03.069
- 678 49. Berry SD, Johnson KS, Myles L, Herndon L, Montoya A, Fashaw S, et al. Lessons learned from frontline  
679 skilled nursing facility staff regarding COVID-19 vaccine hesitancy. *J Am Geriatr Soc*. 2021;69: 1140–  
680 1146. doi:10.1111/jgs.17136

681

682

683

684

685

686

687

688

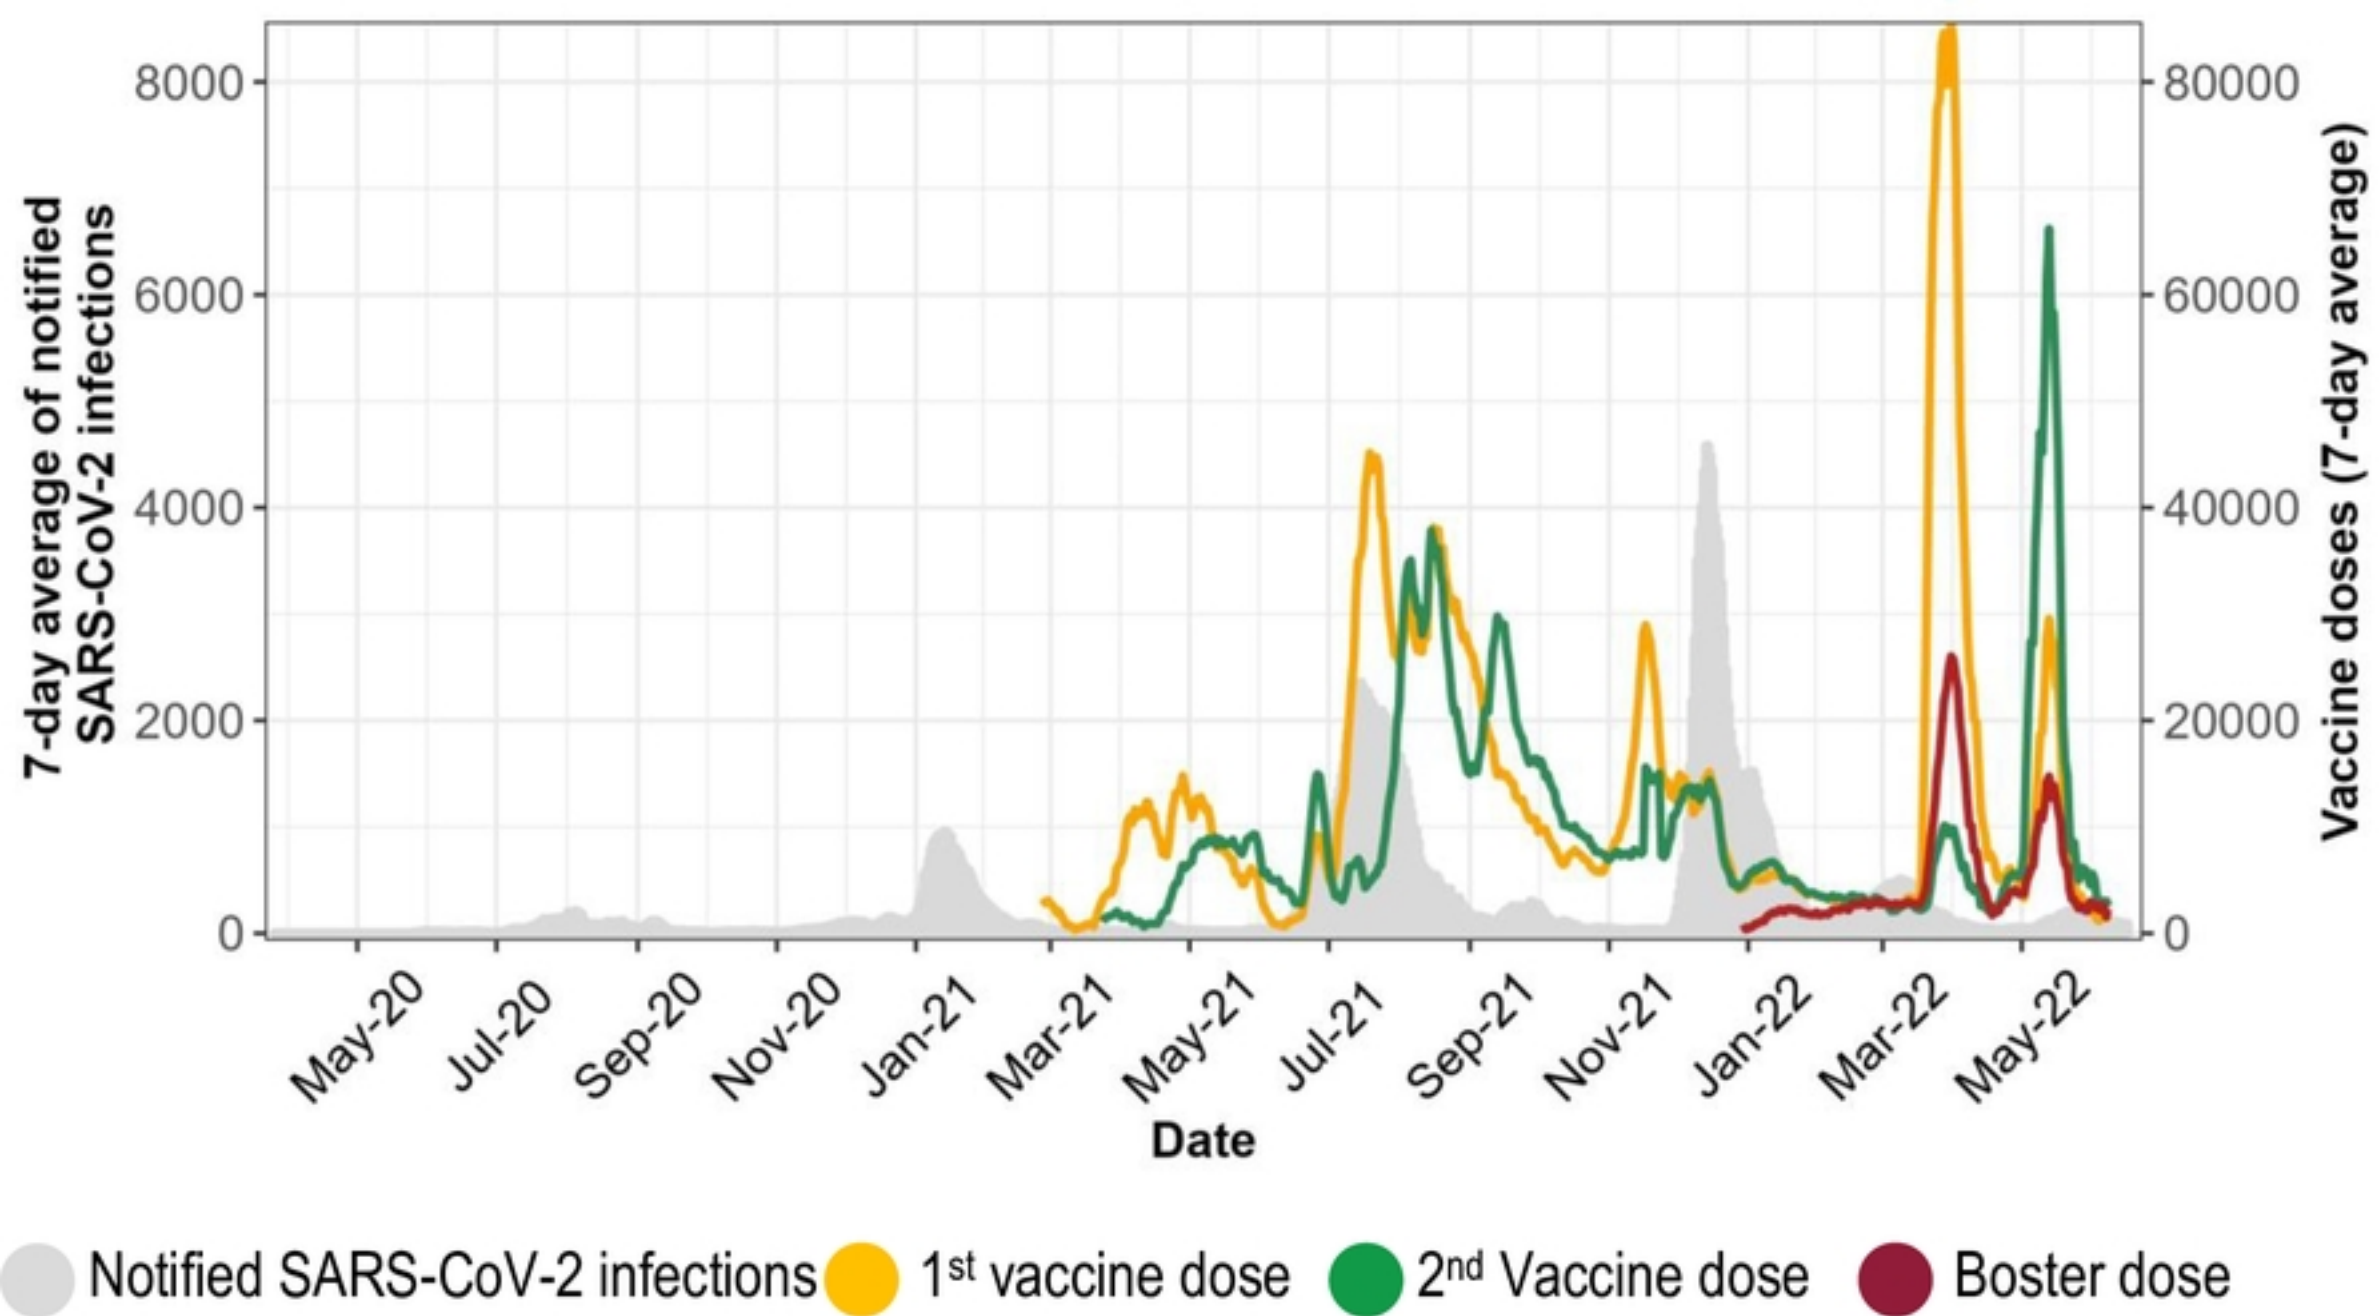

**Fig 1. Routine data on vaccine doses administered and notified SARS-CoV-2 infections obtained from the daily published Ministry of Health and Child Care situational reports.**

Figure 1

Reasons not getting COVID-19 vaccination (%)

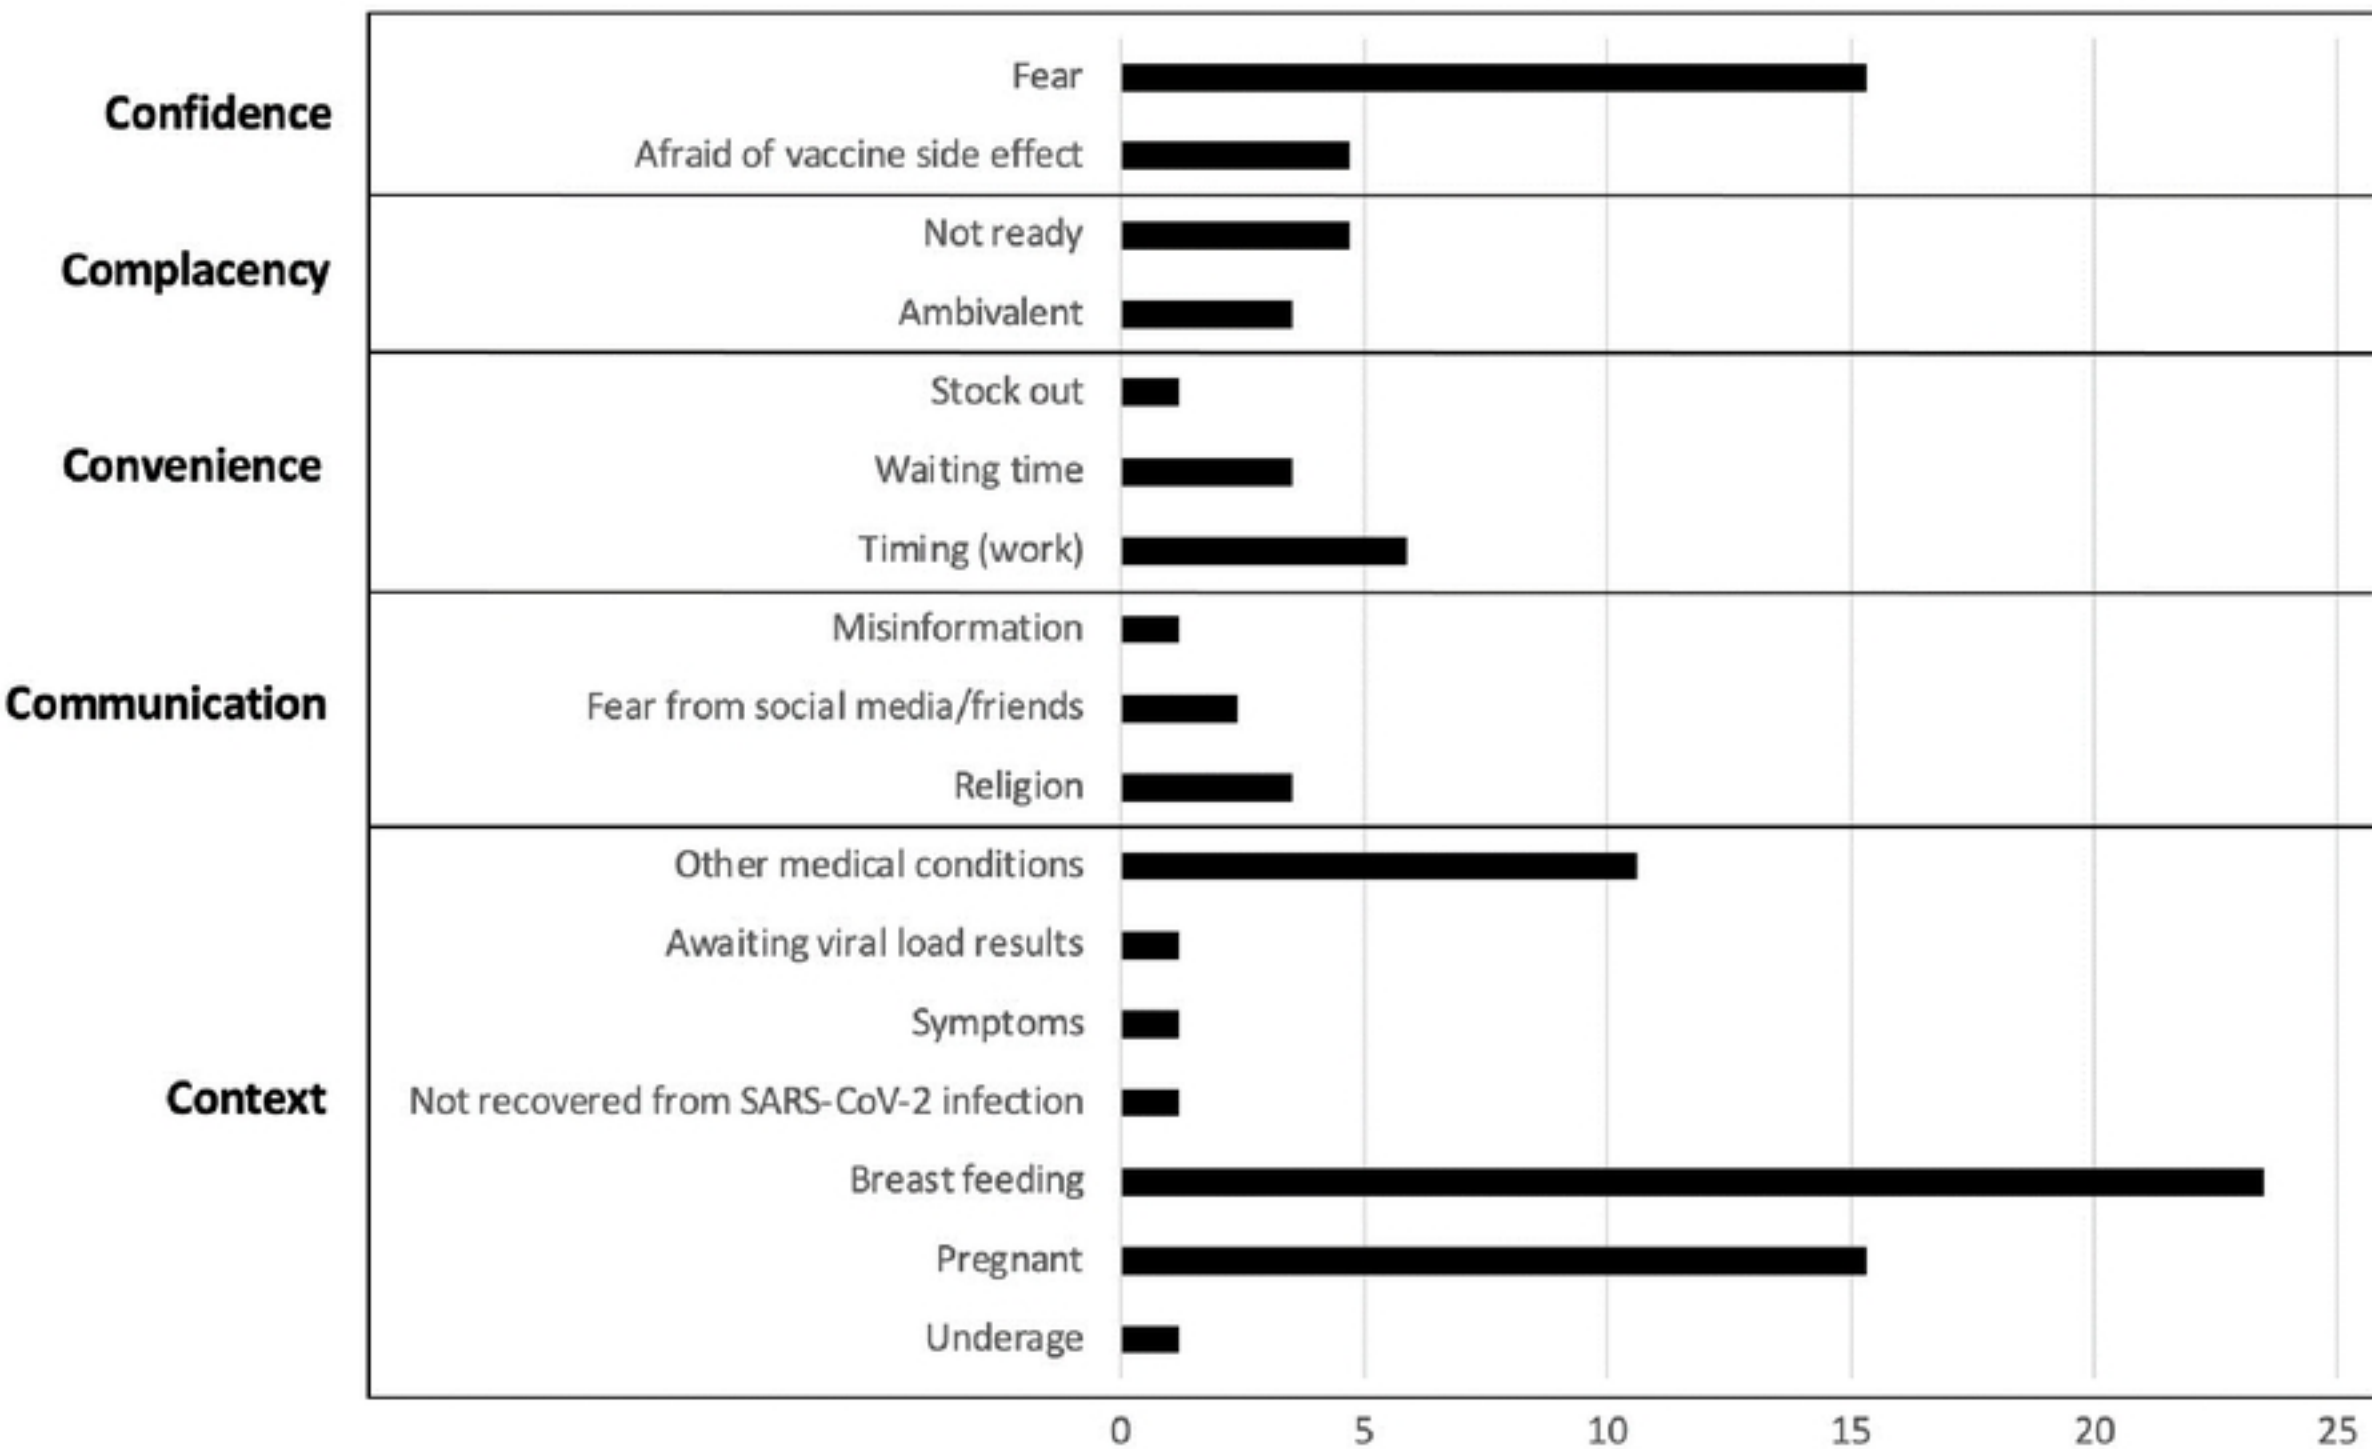

Fig 2. Bar graph showing reasons for no COVID-19 vaccination among healthcare workers (N=87) based on the 5Cs of hesitancy model

Figure 2
